# Supplementary material for: Four-Component Recombinant Protein–Based Vaccine Effectiveness Against Serogroup B Meningococcal Disease in Italy
Source: PubMed Central journal article supplement (PMC10439479; doi:10.1001/jamanetworkopen.2023.29678), 2023-08-18
Supplement: jamanetwopen-e2329678-s003.pdf [file jamanetwopen-e2329678-s003.pdf]

## Data Sharing Statement

Lodi. Four-Component Recombinant Protein–Based Vaccine Effectiveness Against Serogroup B Meningococcal Disease in Italy. *JAMA Netw Open*. Published August 18, 2023.

doi:10.1001/jamanetworkopen.2023.29678

### Data

**Data available:** Yes

**Data types:** Deidentified participant data

**How to access data:** [lorenzo.lodi@unifi.it](mailto:lorenzo.lodi@unifi.it)

**When available:** With publication

### Supporting Documents

**Document types:** None

### Additional Information

**Who can access the data:** Researchers whose proposed use of the data has been approved.

**Types of analyses:** For a specified purpose

**Mechanisms of data availability:** After approval of a proposal
